# Supplementary material for: Efficacy and Safety of Bojungikgi-Tang for Persistent Allergic Rhinitis: A Randomized, Double-Blinded, Placebo-Controlled, Phase II Trial
Source: MDPI journal article supplement (doi:10.3390/healthcare12101017), 2024-05-14
Supplement: s1 [file s1]

**Table S1.** Results for total IgE and eosinophil counts

|                  | Week 0        | Week 4        | Difference    | P-value |
|------------------|---------------|---------------|---------------|---------|
| Total IgE        |               |               |               |         |
| High-dose        |               |               |               |         |
| BJIGT            | 350.92±621.52 | 363.90±616.03 | 11.07±122.30  | 0.8235  |
| (n=35)           |               |               |               |         |
| Standard-dose    |               |               |               |         |
| BJIGT            | 222.75±391.71 | 215.96±406.38 | -6.79±99.38   | 0.4703  |
| (n=35)           |               |               |               |         |
| Placebo          | 256.75±239.64 | 265.62±232.36 | 8.87±59.93    | -       |
| (n=35)           |               |               |               |         |
| Eosinophil count |               |               |               |         |
| High-dose        |               |               |               |         |
| BJIGT            | 205.43±184.44 | 208.53±163.30 | 0.00±122.45   | 0.7540  |
| (n=35)           |               |               |               |         |
| Standard-dose    |               |               |               |         |
| BJIGT            | 145.54±99.51  | 147.76±82.15  | 2.22±80.24    | 0.5308  |
| (n=35)           |               |               |               |         |
| Placebo          | 256.75±239.64 | 265.62±232.36 | -18.22±145.33 | -       |
| (n=35)           |               |               |               |         |

Values are expressed as mean±SD in FAS analysis.

IgE, immunoglobulin E; SD, standard deviation; FAS, full analysis set; BJIGT, Bojungikgi-tang

**Table S2.** Vital signs

|                   |          | Standard-dose<br>BJIGT<br>(N=35) |   |       | High-dose BJIGT<br>(N=35) |   |       | Placebo<br>(N=35) |   |       | P-Value |
|-------------------|----------|----------------------------------|---|-------|---------------------------|---|-------|-------------------|---|-------|---------|
| BP<br>(systolic)  | Baseline | 118.26                           | ± | 14.14 | 119.2                     | ± | 10.93 | 123.89            | ± | 10.24 | 0.116   |
|                   | Visit 3  | 118.86                           | ± | 13.26 | 119.34                    | ± | 11.25 | 120.51            | ± | 9.07  | 0.8205  |
|                   | Visit 5  | 118.09                           | ± | 10.59 | 119.24                    | ± | 11.95 | 122.71            | ± | 8.04  | 0.1662  |
| BP<br>(diastolic) | Baseline | 73.2                             | ± | 10.09 | 73.46                     | ± | 10.43 | 74.49             | ± | 7.33  | 0.4867  |
|                   | Visit 3  | 72.34                            | ± | 9.32  | 72.06                     | ± | 8.74  | 72.60             | ± | 9.63  | 0.9702  |
|                   | Visit 5  | 73.46                            | ± | 10.43 | 72.58                     | ± | 9.53  | 75.15             | ± | 9.02  | 0.4152  |
| Pulse             | Baseline | 76.63                            | ± | 9.16  | 77.14                     | ± | 12.60 | 79.63             | ± | 12.33 | 0.5064  |
|                   | Visit 3  | 79.69                            | ± | 11.24 | 75.43                     | ± | 12.58 | 76.89             | ± | 9.93  | 0.2817  |
|                   | Visit 5  | 77.27                            | ± | 8.44  | 75.12                     | ± | 12.31 | 77.35             | ± | 8.65  | 0.5859  |
| Temperature       | Baseline | 36.39                            | ± | 0.22  | 36.54                     | ± | 0.23  | 36.51             | ± | 0.27  | 0.0257* |
|                   | Visit 3  | 36.53                            | ± | 0.24  | 36.59                     | ± | 0.27  | 36.46             | ± | 0.21  | 0.0806  |
|                   | Visit 5  | 36.45                            | ± | 0.21  | 36.48                     | ± | 0.22  | 36.5              | ± | 0.27  | 0.7305' |

Values are expressed as mean±SD in FAS analysis. No significant differences were observed among groups except for temperature at baseline, which was within the normal range and had no clinical significance.

**Table S3.** Laboratory examinations

A: LFT (Liver Function Test)

|            |          | Standard-dose<br>BJIGT<br>(N=35) |   |        | High-dose BJIGT<br>(N=35) |   |        | Placebo<br>(N=35) |   |        | P-Value |
|------------|----------|----------------------------------|---|--------|---------------------------|---|--------|-------------------|---|--------|---------|
| AST        | Baseline | 18.66                            | ± | 5.17   | 19.17                     | ± | 5.1    | 19.11             | ± | 6.32   | 0.9140  |
|            | Visit 5  | 19.97                            | ± | 7.82   | 19.18                     | ± | 5.85   | 19.35             | ± | 4.66   | 0.8641  |
| ALT        | Baseline | 18.54                            | ± | 11.31  | 18.43                     | ± | 9.98   | 17.97             | ± | 13.18  | 0.9764  |
|            | Visit 5  | 18.67                            | ± | 13.03  | 17.76                     | ± | 11.55  | 18.03             | ± | 11.27  | 0.9511  |
| r-GTP      | Baseline | 23.51                            | ± | 18.11  | 18.69                     | ± | 7.49   | 28.03             | ± | 28.82  | 0.1568  |
|            | Visit 5  | 23.76                            | ± | 19.23  | 18.39                     | ± | 10.59  | 26.29             | ± | 27.60  | 0.2777  |
| ALP        | Baseline | 61.09                            | ± | 20.29  | 63.63                     | ± | 18.89  | 63.11             | ± | 18.73  | 0.8443  |
|            | Visit 5  | 58.21                            | ± | 20.15  | 64.42                     | ± | 18.26  | 18.03             | ± | 11.27  | 0.3359  |
| BUN        | Baseline | 12.8                             | ± | 2.55   | 12.69                     | ± | 3.68   | 11.48             | ± | 2.53   | 0.1230  |
|            | Visit 5  | 12.73                            | ± | 3.18   | 11.94                     | ± | 2.89   | 11.61             | ± | 2.7    | 0.2795  |
| Creatinine | Baseline | 0.78                             | ± | 0.18   | 0.81                      | ± | 0.17   | 0.78              | ± | 0.17   | 0.7473  |
|            | Visit 5  | 0.79                             | ± | 0.2    | 0.79                      | ± | 0.17   | 0.79              | ± | 0.17   | 0.9967  |
| Total      | Baseline | 0.62                             | ± | 0.28   | 0.74                      | ± | 0.45   | 0.55              | ± | 0.28   | 0.0686  |
| Bilirubin  | Visit 5  | 0.61                             | ± | 0.3    | 0.65                      | ± | 0.38   | 0.60              | ± | 0.24   | 0.7760  |
| Glucose    | Baseline | 95                               | ± | 11.72  | 95                        | ± | 12.19  | 93.51             | ± | 0.94   | 0.8108  |
|            | Visit 5  | 96.0                             | ± | 7.73   | 97.36                     | ± | 12.88  | 96.29             | ± | 0.87   | 0.8387  |
| CPK        | Baseline | 96.71                            | ± | 62.24  | 136.49                    | ± | 140.8  | 106.43            | ± | 74.78  | 0.2186  |
|            | Visit 5  | 125.09                           | ± | 142.32 | 156.97                    | ± | 222.79 | 132.71            | ± | 208.92 | 0.7858  |
| Na         | Baseline | 139.34                           | ± | 1.82   | 139.71                    | ± | 1.93   | 139.49            | ± | 1.85   | 0.7067  |
|            | Visit 5  | 138.36                           | ± | 0.29   | 139.03                    | ± | 2.13   | 139.24            | ± | 1.46   | 0.1563  |
| K          | Baseline | 4.34                             | ± | 0.26   | 4.43                      | ± | 0.34   | 4.34              | ± | 0.3    | 0.3468  |
|            | Visit 5  | 4.39                             | ± | 0.27   | 4.34                      | ± | 0.33   | 4.38              | ± | 0.25   | 0.7156  |
| Cl         | Baseline | 103.74                           | ± | 2.06   | 103.43                    | ± | 1.96   | 103.37            | ± | 1.78   | 0.6900  |
|            | Visit 5  | 102.88                           | ± | 2.26   | 103.15                    | ± | 2.27   | 103.56            | ± | 1.69   | 0.4087  |
| PT-INR     | Baseline | 1.02                             | ± | 0.16   | 1.95                      | ± | 2.95   | 1.04              | ± | 0.08   | 0.0381* |
|            | Visit 5  | 2.52                             | ± | 8.47   | 1.35                      | ± | 1.73   | 1.05              | ± | 0.07   | 0.4461  |
| aPTT       | Baseline | 30.11                            | ± | 2.59   | 29.77                     | ± | 2.20   | 29.0              | ± | 2.28   | 0.136   |
|            | Visit 5  | 30.95                            | ± | 4.42   | 29.5                      | ± | 2.58   | 29.6              | ± | 3.13   | 0.1672  |

## B. CBC (Complete Blood Counts)

|            |          | Standard-dose<br>BJIGT<br>(N=35) |   |      | High-dose BJIGT<br>(N=35) |   |        | Placebo<br>(N=35) |   |      | P-Value |
|------------|----------|----------------------------------|---|------|---------------------------|---|--------|-------------------|---|------|---------|
| RBC        | Baseline | 4.76                             | ± | 0.42 | 4.77                      | ± | 0.35   | 4.76              | ± | 0.47 | 0.9970  |
|            | Visit 5  | 4.71                             | ± | 0.48 | 4.72                      | ± | 0.35   | 4.75              | ± | 0.45 | 0.9145  |
| Hemoglobin | Baseline | 14.0                             | ± | 1.34 | 13.85                     | ± | 1.4    | 13.93             | ± | 1.61 | 0.9160  |
|            | Visit 5  | 13.91                            | ± | 1.53 | 17.52                     | ± | 21.5   | 14.84             | ± | 5.64 | 0.4946  |
| Hematocrit | Baseline | 41.91                            | ± | 4.0  | 41.85                     | ± | 3.61   | 42.10             | ± | 4.48 | 0.9655  |
|            | Visit 5  | 41.84                            | ± | 4.38 | 41.34                     | ± | 3.96   | 42.16             | ± | 4.51 | 0.7331  |
| WBC        | Baseline | 5.46                             | ± | 1.29 | 5.05                      | ± | 1.26   | 5.89              | ± | 1.32 | 0.0289* |
|            | Visit 5  | 5.69                             | ± | 1.28 | 5.16                      | ± | 1.47   | 5.75              | ± | 1.35 | 0.1559  |
| Netrophil  | Baseline | 58.87                            | ± | 6.74 | 58.79                     | ± | 7.57   | 60.38             | ± | 7.24 | 0.5833  |
|            | Visit 5  | 60.67                            | ± | 13.1 | 59.25                     | ± | 8.5    | 58.57             | ± | 7.48 | 0.6810  |
| Monocyte   | Baseline | 7.08                             | ± | 1.61 | 29.01                     | ± | 123.55 | 7.41              | ± | 2.38 | 0.3416  |
|            | Visit 5  | 7.99                             | ± | 5.68 | 7.56                      | ± | 2.07   | 7.13              | ± | 1.63 | 0.6208  |
| Lymphocyte | Baseline | 30.67                            | ± | 6.21 | 29.27                     | ± | 6.78   | 28.98             | ± | 6.77 | 0.5193  |
|            | Visit 5  | 27.06                            | ± | 8.68 | 29.15                     | ± | 7.52   | 30.63             | ± | 7.55 | 0.1855  |
| Eosinophil | Baseline | 2.98                             | ± | 2.0  | 3.51                      | ± | 2.57   | 2.84              | ± | 1.24 | 0.3401  |
|            | Visit 5  | 2.37                             | ± | 1.26 | 3.68                      | ± | 2.52   | 3.21              | ± | 1.82 | 0.0227* |
| Basophil   | Baseline | 0.41                             | ± | 0.18 | 0.62                      | ± | 0.91   | 0.39              | ± | 0.21 | 0.1659  |
|            | Visit 5  | 0.4                              | ± | 0.21 | 0.43                      | ± | 0.48   | 0.46              | ± | 0.19 | 0.7111  |
| Platelet   | Baseline | 27.61                            | ± | 6.2  | 25.83                     | ± | 5.89   | 26.89             | ± | 5.4  | 0.4416  |
|            | Visit 5  | 27.32                            | ± | 5.61 | 25.82                     | ± | 6.41   | 27.44             | ± | 4.3  | 0.4098  |
| ESR        | Baseline | 10.46                            | ± | 7.07 | 10.77                     | ± | 6.55   | 9.91              | ± | 9.71 | 0.9000  |
|            | Visit 5  | 9.88                             | ± | 7.3  | 10.61                     | ± | 6.88   | 9.82              | ± | 8.87 | 0.8998  |

C. U/A (Urinalysis)

|    |          | High-dose BJIGT<br>(N=35) |   |      | Placebo<br>(N=35) |   |      | Standard-dose BJIGT<br>(N=35) |   |      | P-Value |
|----|----------|---------------------------|---|------|-------------------|---|------|-------------------------------|---|------|---------|
| SG | Baseline | 1.02                      | ± | 0.01 | 1.02              | ± | 0.0  | 1.03                          | ± | 0.05 | 0.5472  |
|    | Visit 5  | 1.32                      | ± | 1.23 | 1.02              | ± | 0.0  | 1.14                          | ± | 0.68 | 0.3218  |
| PH | Baseline | 5.70                      | ± | 0.87 | 5.74              | ± | 0.91 | 5.91                          | ± | 0.84 | 0.5572  |
|    | Visit 5  | 5.58                      | ± | 1.28 | 5.71              | ± | 0.78 | 5.82                          | ± | 0.79 | 0.6287  |

Values are expressed as mean±SD in FAS analysis. No significant differences were observed among groups. In some cases where differences were observed, they were within the normal range and lacked clinical significance.
